1 **Established *Gardnerella* biofilms can survive metronidazole treatment by reducing**  
2 **metabolic activity**

3

4 Salahuddin Khan<sup>#</sup> and Janet E. Hill\*

5

6 Department of Veterinary Microbiology, University of Saskatchewan, Saskatoon, Saskatchewan,  
7 Canada, S7N 5B4

8

9 \*Correspondence: 52 Campus Drive, Saskatoon, SK, S7N 5B4, Canada

10 <sup>#</sup>Present address: Dept of Biochemistry and Biomedical Sciences, McMaster University,  
11 Hamilton, Ontario, Canada

12

13

14 E-mail:

15 SK: [salahuddin.khan@usask.ca](mailto:salahuddin.khan@usask.ca)

16 JEH: [Janet.Hill@usask.ca](mailto:Janet.Hill@usask.ca)

17

18 ORCID:

19 SK: 0000-0002-6826-9319

20 JEH: 0000-0002-2187-6277

21

22 **Abstract**

23 *Gardnerella* spp., a hallmark of bacterial vaginosis, can form biofilm and it has been suggested  
24 that failure of antibiotic treatment of bacterial vaginosis and recurrent vaginosis are linked to its  
25 ability to form biofilm. Here, we tested the hypothesis that biofilm formation provides protection  
26 from the effects of metronidazole. We performed a broth microdilution assay to measure the  
27 minimum inhibitory concentration (MIC) of metronidazole for thirty-five *Gardnerella* isolates in  
28 two different growth media: one medium in which *Gardnerella* spp. grow primarily as biofilm  
29 and the other medium in which *Gardnerella* spp. grow primarily in planktonic form. The MIC of  
30 *Gardnerella* isolates observed in the two conditions were highly correlated ( $R^2= 0.69$ ,  $p < 0.001$ )  
31 and 27/35 isolates had no difference in MIC between the two growth modes. When established  
32 biofilms were treated with metronidazole, live *Gardnerella* could be recovered following  
33 treatment in most cases (7/9 isolates tested). Metabolic activity of established biofilms of thirty-  
34 one isolates with and without metronidazole treatment was measured using a resazurin assay.  
35 Most (27/31) isolates showed reduced metabolic activity following treatment with 128  $\mu\text{g/ml}$  of  
36 metronidazole relative to untreated controls. The amount of biofilm produced by *Gardnerella*  
37 isolates was not enhanced by sub-inhibitory concentrations of metronidazole and scanning  
38 electron microscopy revealed no architectural differences between treated and untreated  
39 biofilms. Our results suggest that *Gardnerella* spp. growing in established biofilms reduce  
40 metabolic activity as a mechanism of protection from the bactericidal effects of metronidazole.

41

## 42 **Introduction**

43 *Gardnerella* spp. are considered a hallmark of bacterial vaginosis: a vaginal dysbiosis defined by  
44 the shift from a *Lactobacillus* spp. dominated microbiome to a more diverse microbiome,  
45 comprising many aerobic and anaerobic bacteria, including *Gardnerella* spp.. The genus  
46 *Gardnerella* includes at least four cpn60-defined subgroups corresponding to four whole-genome  
47 sequence defined clades, which were more recently amended to thirteen genome species (1–3).  
48 One major diagnostic feature of bacterial vaginosis is the presence of clue cells – epithelial cells  
49 coated with multispecies biofilm (4, 5). It has been observed that *Gardnerella* accounts for a  
50 significant proportion of this multispecies biofilm *in vivo* (6), and several studies have shown  
51 that *Gardnerella* spp. can also form biofilm *in vitro* (7–10). Since the recognition of multiple  
52 *Gardnerella* spp., it has also been demonstrated *in vitro* that *Gardnerella* can form multispecies  
53 biofilm (8). Biofilm formation is often considered a stress response that protects bacterial cells  
54 from environmental stresses such as antimicrobial substances, immune cells, and predators (11–  
55 15). Alternatively, biofilm may be a natural and preferred mode of growth for some bacteria in  
56 particular environments (12).

57 Growth in biofilm form can provide protection from antibiotics in a variety of ways including  
58 enhanced production of extracellular matrix, reduction of metabolic activity, generation of  
59 environmental heterogeneity, and induction of phenotypic diversity (16, 17). Slow diffusion of  
60 antimicrobials within a biofilm may allow the bacteria living within to produce more  
61 extracellular matrix to prevent penetration of antibiotics (18). In fact, for some well characterized  
62 bacterial species, sublethal concentration of antibiotics have been demonstrated to lead to  
63 increased production of biofilm (19–22).

64 Metronidazole, a bactericidal drug that causes DNA breakage by formation of reactive oxygen  
65 species (23), is widely prescribed for the treatment of bacterial vaginosis (9) and there is  
66 increasing concern about treatment failure (24, 25). Resistance to metronidazole can occur  
67 through reduced uptake of the prodrug, increased export and nitroimidazole reductase activity  
68 (26, 27). The ability of *Gardnerella* spp. to form biofilm is often suggested to be correlated with  
69 metronidazole treatment failure and recurrent BV (9, 24, 25, 28). Although metronidazole  
70 resistance in *Gardnerella* spp. has been reported, no mechanisms other than their capacity to  
71 form biofilm has yet been suggested (5, 24, 25, 29). The objectives of our current study,  
72 therefore, were to determine if biofilm formation by *Gardnerella* spp. provides protection against  
73 metronidazole, if sub-inhibitory concentrations of metronidazole stimulate biofilm production,  
74 and to identify possible mechanisms of protection against metronidazole treatment of established  
75 *Gardnerella* biofilm.

76

## 77 **Methods**

### 78 **Bacterial Isolates**

79 Thirty-five *Gardnerella* isolates representing the four subgroups defined by cpn60 barcode  
80 sequence ( $n=9$ , subgroup A (including *G. swidsinskii* and *G. leopoldii*);  $n=10$ , subgroup B (*G.*  
81 *piotii* and genome sp. 3);  $n=9$  subgroup C (*G. vaginalis*); and  $n=7$ , subgroup D (genome sp. 8,  
82 9 and 10) were revived from freezer stocks on Columbia agar plates supplemented with 5% (v/v)  
83 sheep blood by incubating them anaerobically for 48 h at 37 °C (BD GasPak EZ Anaerobe Gas  
84 Generating Pouch System, NJ, USA). To prepare inoculum for the broth microdilution assay,  
85 approximately ten well-isolated colonies from each blood agar plate were transferred to 5 ml

86 brain heart infusion (BHI) medium supplemented with 0.25% (w/v) maltose and 10% (v/v) heat  
87 inactivated horse serum and incubated anaerobically for 18 h at 37 °C.

88

### 89 **Broth microdilution assay**

90 A stock solution, of metronidazole (102.4 mg/ml, M3761-25G, Sigma-Aldrich, ON, Canada) in  
91 DMSO was prepared and stored at -20 °C. Immediately before each experiment, the stock  
92 solution was diluted 1:100 in DMSO to make a 1024 µg/ml solution. A broth microdilution assay  
93 was performed to determine the minimum inhibitory concentration (MIC) of metronidazole (30).  
94 Briefly, 100 µl of media were aliquoted into each well of a flat bottom 96 well plate (Corning  
95 Costar, NY, USA) using a multichannel pipettor. To make two-fold serial dilutions, 100 µl of  
96 1024 µg/ml metronidazole was added to each well of the first column of a 96-well plate. After  
97 mixing by pipetting up and down 4-6 times, 100 µl was transferred to the second column, and the  
98 process was repeated to column 10. After pipetting up and down, 100 µl from column 10, instead  
99 of transferring to column 11, was discarded. Column 11 was used as growth control (no  
100 antibiotic). Column 12 was used negative control (sterile media). A freshly grown broth culture  
101 was adjusted to an OD<sub>595</sub> of 0.5, corresponding to 10<sup>6</sup>-10<sup>7</sup> cfu/ml, and 5 µl of adjusted broth  
102 culture was added to each well of the 96 well plate, up to column 11. The plates were then  
103 incubated anaerobically at 37 °C for 72 h. The process was repeated for all 35 isolates, and each  
104 isolate was tested in two growth media: BHI + 0.25% maltose (v/v) and BHI + 0.25% maltose  
105 (v/v) + 10% heat inactivated horse serum.

106

### 107 **Co-culture microbroth dilution assay**

108 Four representative isolates of the four subgroups were selected for a co-culture assay (Subgroup  
109 A, VN003; Subgroup B, N170; Subgroup C, N165, and Subgroup D, NR002). All four isolates  
110 were revived on blood agar plates. Colonies were harvested and resuspended in BHI + 0.25%  
111 maltose (v/v) + 10% inactivated horse serum. The resuspended isolates were then incubated for  
112 18 h anaerobically at 37 °C. The OD<sub>595</sub> of fresh cultures were adjusted to 0.5. Isolates were  
113 mixed in equal proportions in snap cap tubes (15 ml) in six combinations: AB, AC, AD, BC, BD,  
114 and CD. Broth microdilution assays of co-cultures were performed as described above.

115

### 116 **Quantification of total growth, planktonic and biofilm growth**

117 The total growth in each well at 72 h was determined by measuring optical density at 595 nm  
118 using a microplate reader (VarioSkan LUX Multimode plate reader). After measuring the total  
119 growth, which includes both the planktonic bacteria and any biofilm formed at the bottom of the  
120 well, the supernatant portion (planktonic growth) was transferred to a fresh flat-bottom 96 well  
121 plate scanned at 595 nm. Biofilm quantification was performed using a CV assay as described  
122 previously (8). Briefly, the 96-well plates were thoroughly washed twice with water. The wells  
123 were then stained with 1% (w/v) crystal violet for 20 minutes. Then the plates were washed  
124 twice with water and were dried before the addition of 33% (v/v) glacial acetic for biofilm  
125 solubilization. The plates were then read at 595 nm to quantify biofilm.

126

### 127 **Metabolic activity and viability measurement**

128 Bacterial colonies harvested from blood agar plates were transferred to BHI + 0.25% maltose +  
129 10% heat-inactivated horse blood serum and were incubated anaerobically for 18h. Inoculum  
130 was prepared using 18 h old culture by adjusting the OD to 0.5 (corresponding to 10<sup>6</sup>-10<sup>7</sup> cfu/ml)

131 in BHI + 0.25% maltose and 100  $\mu$ l was pipetted into each well of duplicate 96-well plates (one  
132 plate for viability assay and one for metabolic activity measurement). One column of each plate  
133 was maintained containing sterile media only as negative control. After 48h of anaerobic  
134 incubation at 37 °C, each plate was divided into two sections: rows A through D as control and E  
135 through H as treatment. Overall OD<sub>595</sub> was recorded, and the planktonic portion was transferred  
136 to a new plate to measure planktonic OD<sub>595</sub> only. Fresh BHI + 0.25% maltose was pipetted into  
137 the control wells. For the treatment wells, fresh BHI + 0.25% maltose was supplemented with  
138 metronidazole at a final concentration of 128  $\mu$ g/ml. Media supplemented with metronidazole  
139 were pipetted into treatment wells (Rows E-H) and the 96-well plates were incubated  
140 anaerobically at 37 °C for another 24h. Following 24h incubation, overall OD<sub>595</sub> was measured.  
141 The planktonic fraction (supernatant) was transferred to a new plate and OD<sub>595</sub> was recorded.  
142 To determine viability of the cells growing in the biofilm mode post-treatment, biofilm formed at  
143 the bottom of wells were scraped into 100  $\mu$ l of PBS added to each well, pipetted up and down to  
144 completely resuspend the cells and then 10  $\mu$ l was transferred into new 96-well plate containing  
145 90  $\mu$ l of PBS using a multichannel pipettor. A serial dilution was made in the fresh 96-well plate  
146 and 10<sup>-3</sup> through 10<sup>-6</sup> dilutions were spotted (2.5  $\mu$ l each spot) onto blood agar plates. The blood  
147 agar plates were incubated for 48 h and the colonies were counted on each spot. Each experiment  
148 contained four technical replicates.  
149 To measure metabolic activity, 100  $\mu$ l of PBS (pH 7) was added to each well of the original plate  
150 after removal of the planktonic growth. CellTitre Blue® reagent (20  $\mu$ l)(Promega G8080) was  
151 pipetted into both plates: biofilm growth plate and planktonic growth plate, avoiding direct  
152 exposure of light. The incubation period for planktonic and biofilm fractions varied: visual  
153 colour change was observed in planktonic fractions containing plates sooner (at 20 min) than the

154 biofilm cells containing plates. Plates were monitored every 20 min for up to 2 hours of  
155 incubation at 37 °C. Fluorescence for the biofilm forming cells was recorded after 2 h.  
156 Fluorescence was measured using VarioSkan LUX Multimode plate reader at 560 nm  
157 (excitation) and 590 nm (emission). Metabolic activity was measured by subtracting RFU values  
158 of the sterile control wells from the RFU values of the test wells.

159

### 160 **Scanning Electron Microscopy**

161 One *Gardnerella* isolate (N170, subgroup B, genome sp. 3) was grown anaerobically for 48 h on  
162 blood agar. Ten well isolated colonies were harvested and transferred to BHI + 0.25% maltose +  
163 10% horse blood serum. After 18h of growth, inoculum was prepared by adjusting the OD<sub>600</sub> to  
164 0.5 in BHI + 0.25%. An aliquot of 500 µl of inoculum was pipetted into 24-well plates  
165 containing autoclaved round glass coverslips. The 24-well plate was incubated anaerobically for  
166 48 h before replacing the media with fresh BHI + 0.25% maltose (control) and BHI + 0.25%  
167 maltose supplemented with 128 µg/ml of metronidazole (treatment). The planktonic fraction was  
168 removed 24 h post-treatment and the coverslips were flooded with PBS. Biofilm cells were fixed  
169 by carefully adding 500 µl of 2% glutaraldehyde in 0.1 M sodium cacodylate (pH 7.2) and by  
170 incubating for 4 hours at 4 °C. Cells were further fixed by adding 1% osmium tetroxide (OsO<sub>4</sub>)  
171 for 1 h followed by dehydration by consecutive washes in 30%, 50%, 70%, 80%, 90%, 95%, and  
172 100% (3×) ethanol. After fixation, the coverslips were carefully washed twice with 0.1 M  
173 sodium cacodylate (pH 7.2), and then 500 µl of fresh wash buffer was added to each well and the  
174 24-well plate was sealed with parafilm. Fixed cells were dried and substituted using  
175 hexamethyldisilazane (HMDS) by first adding 1:2 HMDS and EtOH solution for 10 min followed  
176 by treatment with 2:1 HMDS and EtOH solution for an additional 10 min. Finally, cells were



177 treated with 100% HMDS twice for 10 min. Excess HMDS was removed, and coverslips were  
178 air dried overnight. Prior to microscopic observation, samples were treated with 10 nm gold. The  
179 biofilm cells were then observed at different magnifications (400X, 6000X, 20,000X, 45,000X)  
180 using a scanning electron microscope (Hitachi UHR FE-SEM SU8000 Series). All captured  
181 images were evaluated by an observer blinded to the treatment to avoid observation bias.

182

### 183 **Statistical analysis**

184 To test if biofilm growth and planktonic growth were significantly different in the two different  
185 media (with or without serum), a Mann-Whitney test was performed. To determine the  
186 relationship between the MIC values for *Gardnerella* isolates in the two different culture  
187 conditions, a Pearson-coefficient test was performed. To determine if the cell counts were  
188 significantly different between controls and treatments, a Mann-Whitney U test and Holm-Šídák  
189 multiple comparisons were performed. To test if metabolic activity is significantly different  
190 between treated and control biofilms, a multiple unpaired t-test and Holm-Šídák multiple  
191 comparisons were performed. All statistical analyses were performed using GraphPad Prism  
192 (v.9.2.0).

193

### 194 **Results**

#### 195 **Impact of serum on biofilm formation**

196 To investigate if the presence of serum affects biofilm formation, all isolates were grown in BHI  
197 + 0.25% (w/v) maltose with or without addition of 10% (v/v) heat inactivated horse serum.  
198 Thirty-five isolates were grown in four technical replicates. Planktonic growth was significantly  
199 higher in media containing serum compared to serum-free media while biofilm growth was

200 significantly higher in serum-free media than in media with serum ( $p < 0.0001$ , Mann-Whitney U  
201 test, Fig 1).

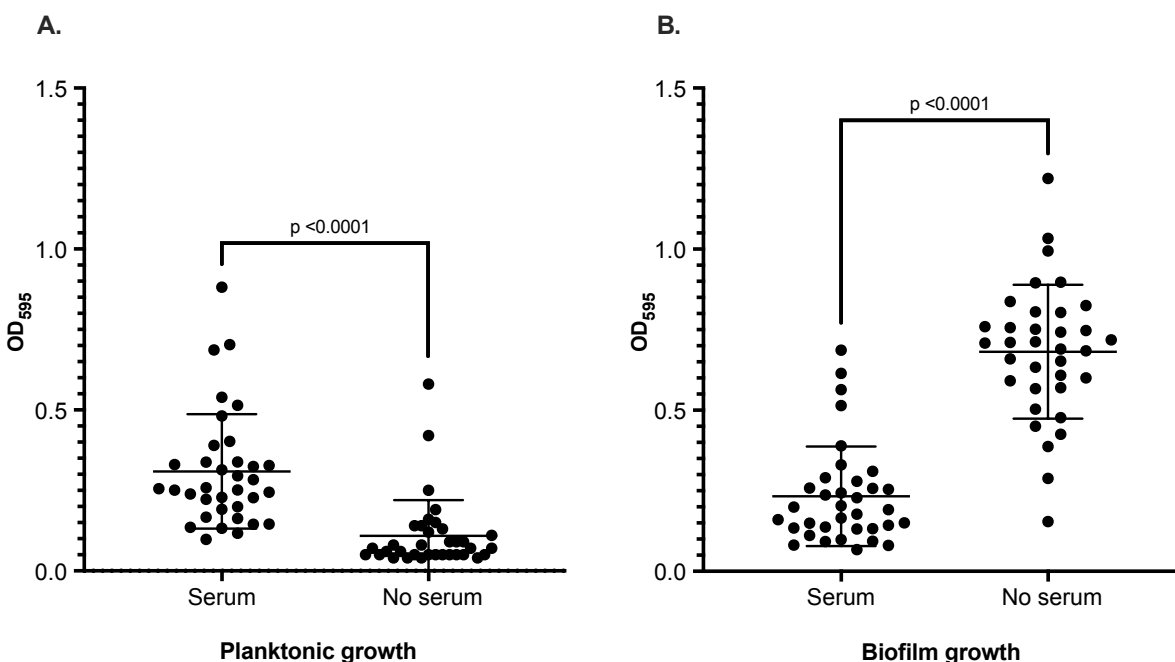

**Fig 1:** Growth mode is affected by serum (A) Planktonic growth in media with serum (BHI+ 0.25% maltose (w/v) + 10% (v/v) heat inactivated horse serum) and without serum (BHI+ 0.25% (w/v) maltose) measured by absorbance of broth culture. (B) Biofilm formation in media with serum (BHI+ 0.25% (w/v) maltose + 10% (v/v) heat inactivated horse serum) and without serum (BHI+ 0.25% (w/v) maltose) measured by crystal violet stain. Each data point is the average of four technical replicates of each of 35 isolates. Mann-Whitney test was performed to test significance and p values are indicated.

202

### 203 **Impact of growth mode on susceptibility to metronidazole**

204 Since serum significantly reduces biofilm formation and encourages planktonic growth, we used  
205 presence or absence of serum to control mode of growth of the tested isolates in subsequent broth  
206 microdilution assays. If growth in biofilm reduces susceptibility to metronidazole, we would  
207 expect to see higher MIC values for isolates grown in serum-free media than in media with  
208 serum. Thirty-five *Gardnerella* isolates were grown in metronidazole concentrations ranging  
209 from 1  $\mu\text{g/ml}$  to 512  $\mu\text{g/ml}$  (two-fold serial dilution) in BHI + 0.25% (w/v) maltose with or  
210 without 10% (v/v) heat inactivated horse serum. The MIC for most of the tested isolates (19/35,

211 54.28%) was 64 µg/ml (range 4-128 µg/ml). Overall, MIC values determined in the two media  
212 were highly correlated (Pearson correlation co-efficient,  $R^2= 0.69$ ,  $p < 0.001$ ) and 27/35 isolates  
213 had the same MIC in both media. Of the 35 isolates tested, the observed MIC differed between  
214 the two conditions for eight (8/35, 23%) isolates: NR010 of subgroup A; GH007, GH019 &  
215 GH022 of subgroup B; and N165, GH015, GH021, and VN001 of subgroup C. Except N165, the  
216 seven other isolates (GH007, GH015, GH019, GH021, GH022, NR010, and VN001) had a lower  
217 MIC value in serum free media than in media with serum. There was no apparent relationship  
218 between subgroup and MIC (Table 1).

219

220  
221  
222

**Table 1.** MIC of thirty-five *Gardnerella* isolates in BHI+ 0.25% (w/v) maltose with or without 10% (v/v) heat inactivated horse serum.

| Subgroup | Isolate   | MIC ( $\mu\text{g/ml}$ ) |          |
|----------|-----------|--------------------------|----------|
|          |           | + serum                  | No serum |
| <b>A</b> | GH005     | 32                       | 32       |
|          | NR010     | 1                        | 32       |
|          | NR015     | 32                       | 32       |
|          | NR016     | 64                       | 64       |
|          | NR019     | 64                       | 64       |
|          | NR020     | 64                       | 64       |
|          | VN003     | 32                       | 32       |
|          | WP021     | 64                       | 64       |
|          | WP022     | 16                       | 16       |
| <b>B</b> | GH007     | 16                       | 8        |
|          | GH019     | 4                        | 4        |
|          | GH022     | 32                       | 2        |
|          | N95       | 64                       | 64       |
|          | N101      | 64                       | 64       |
|          | N144      | 64                       | 64       |
|          | N170      | 64                       | 64       |
|          | NR026     | 64                       | 64       |
|          | VN002     | 64                       | 64       |
| W11      | 4         | 4                        |          |
| <b>C</b> | ATCC14018 | 32                       | 8        |
|          | GH015     | 32                       | 32       |
|          | GH021     | 16                       | 8        |
|          | N165      | 64                       | 128      |
|          | NR001     | 8                        | 4        |
|          | NR038     | 64                       | 64       |
|          | NR039     | 64                       | 64       |
|          | VN001     | 32                       | 4        |
|          | WP023     | 16                       | 16       |
| <b>D</b> | NR002     | 64                       | 64       |
|          | NR003     | 64                       | 64       |
|          | NR043     | 64                       | 64       |
|          | NR044     | 64                       | 64       |
|          | NR047     | 64                       | 64       |
|          | N160      | 64                       | 64       |
|          | WP012     | 64                       | 64       |

223

#### 224 **Viability of treated biofilm vs. control biofilm**

225 In the broth microdilution assay, a suspension of cells is exposed to antibiotic simultaneously  
226 with inoculation of assay plates. To investigate if established biofilms formed by *Gardnerella*  
227 provide protection against subsequent metronidazole treatment, preformed biofilms (48 h old) of

228 nine *Gardnerella* isolates were treated for 24 h with 128  $\mu\text{g/ml}$  metronidazole, which is double  
229 the highest recorded MIC value for any of the tested isolates. Total viable counts of isolates  
230 treated with metronidazole and untreated controls were compared. Viable cells were recovered  
231 from all controls and all treated biofilms except VN003 and ATCC 14018, which had no viable  
232 cells after treatment. In cases where viable cells were recovered, there were no significant  
233 differences in cfu/ml between treated and untreated (Fig 2, Mann-Whitney test, Holm-Šídák  
234 multiple comparisons).

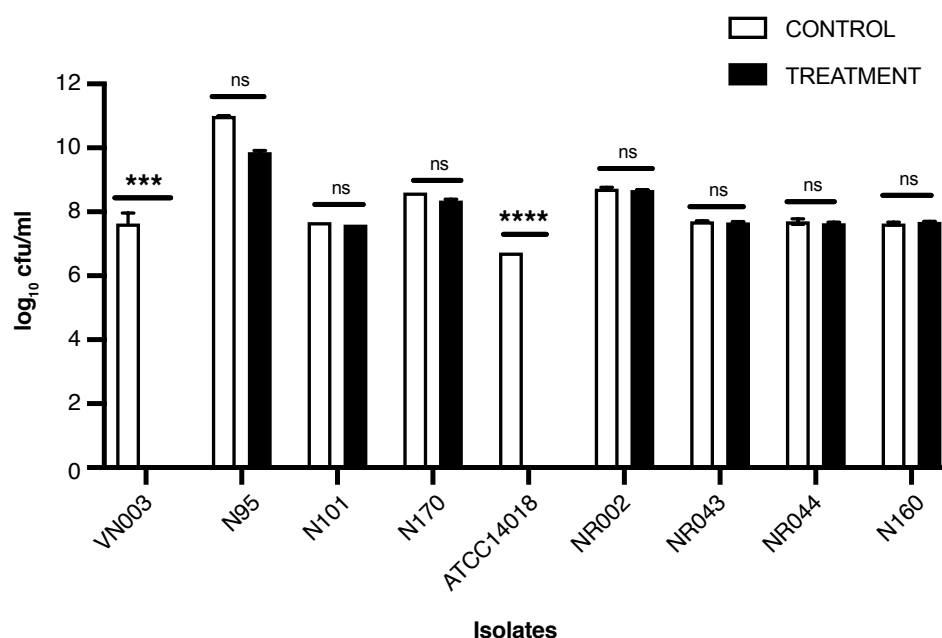

**Fig 2:** *Gardnerella* isolates in established biofilms can survive metronidazole treatment. 48 h old established biofilms of nine *Gardnerella* isolates were either treated with 128  $\mu\text{g/ml}$  of metronidazole or not treated (controls). Biofilm cells were scraped, resuspended and total viable counts were performed on blood agar plates. Error bars show standard deviation of four technical replicates. Mann-Whitney U test was performed to test statistical significance (\*\*\*\* =  $p < 0.0001$ , \*\*\* =  $p < 0.001$ , ns = not significant).

235

### 236 **Metabolic activity of treated biofilm vs. control biofilm**

237 To determine if treated and untreated biofilms differ in metabolic activity, a resazurin assay was  
238 performed. If cells are metabolically active, resazurin is reduced to resosurfin – a highly

239 fluorescence substance. We measured fluorescence (560/590nm) for thirty-one *Gardnerella*  
240 isolates growing in biofilm mode, which were untreated or treated with 128 µg/ml metronidazole  
241 for 24 h. Metabolic activity, measured as RFU values, was appreciably higher in untreated  
242 biofilms: in 87% (27/31) of isolates metabolic activity was lower in the metronidazole treated  
243 biofilm than in the corresponding untreated control (Fig 3). Of the 27 isolates which showed  
244 reduced metabolic activity in preformed biofilms treated with metronidazole, the reduction was  
245 significant in seventeen isolates (Fig 3, unpaired t-test, Holm-Šídák multiple comparisons).  
246 Although three isolates (NR021, N95, NR026) showed higher metabolic activity in treatment  
247 than in controls, these differences were not significant (Fig 3).

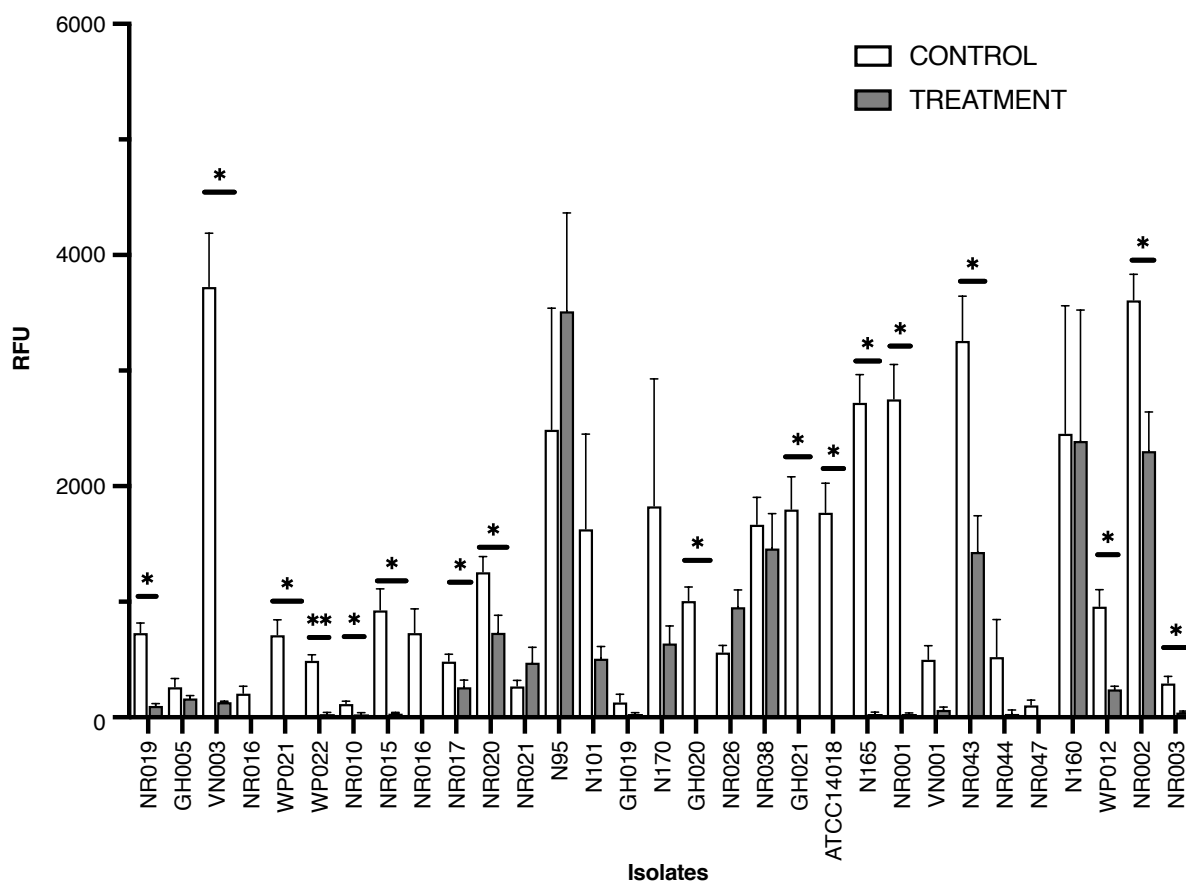

**Fig 3:** Metabolic activity of *Gardnerella* isolates growing in biofilms is reduced after metronidazole treatment. Thirty-three *Gardnerella* isolates were grown in BHI + 0.25% maltose for 48 h to form biofilms. Biofilms were treated with 128  $\mu$ g/ml of metronidazole for 24 h, with four replicates per isolate. Metabolic activity was measured as baseline-subtracted relative fluorescence units (RFU) at 560/590 nm. An unpaired t-test and Holm-Šidák multiple comparisons were performed to test if the differences were statistically significant (\* =  $p < 0.005$ , \*\* =  $p < 0.05$ ).

248

### 249 **Impact of sub-inhibitory metronidazole on biofilm formation**

250 To investigate if sub-MIC concentrations of metronidazole stimulate biofilm formation by

251 *Gardnerella*, we compared the amount of biofilm growth of each isolate at each concentration of

252 metronidazole in serum-free media. No enhancement of biofilm formation was observed in most

253 of the tested isolates in the presence of metronidazole compared to biofilm formation in the

254 absence of metronidazole, except for NR026 (Subgroup B), VN001 (Subgroup C), and NR043

255 (Subgroup D) (Fig 4).

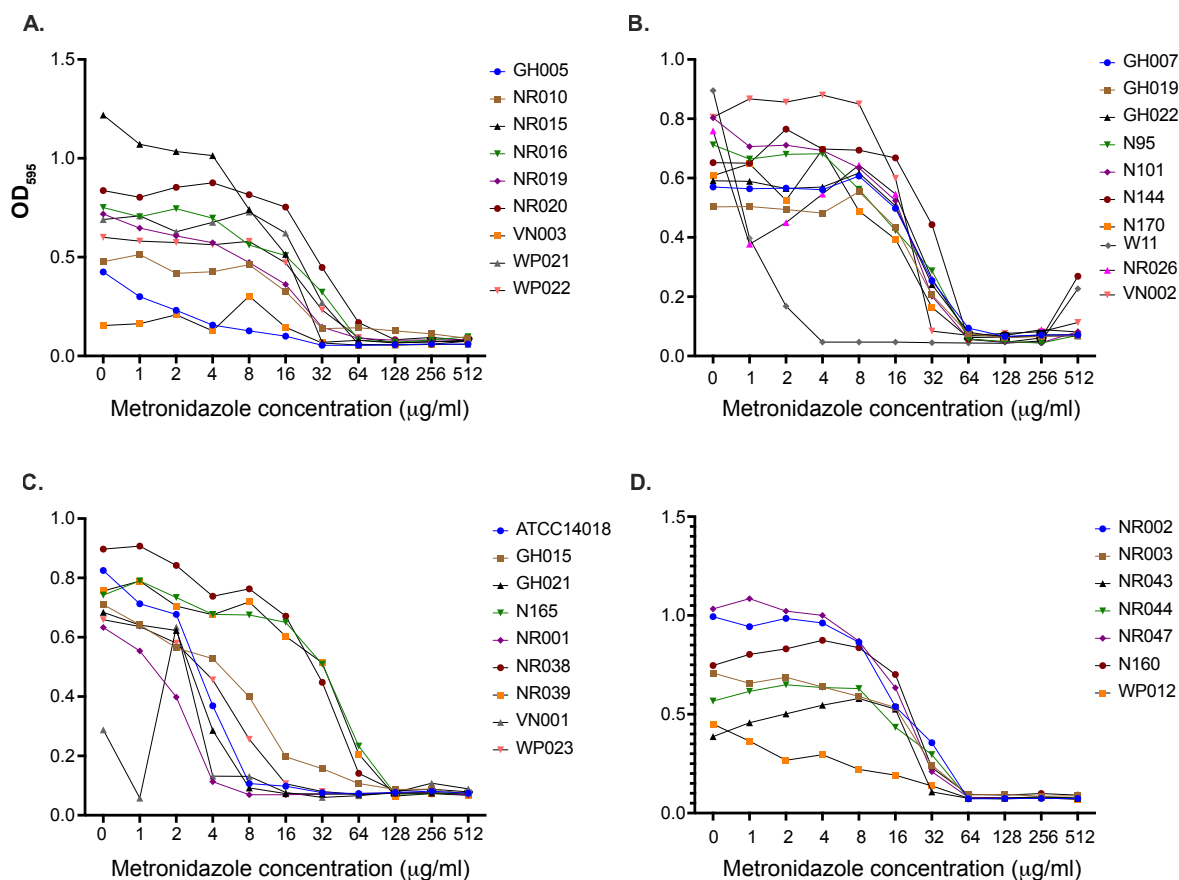

**Fig 4:** Biofilm formation at different concentrations of metronidazole. Thirty-five *Gardnerella* isolates were grown in media without serum. Each isolate was replicated four times in a 96-well plate. Crystal violet staining was performed to quantify biofilm biomass and OD<sub>595</sub> measured. Each data point is the average of four technical replicates. Results are shown for isolates in cpn60-defined subgroups A, B, C and D (panels A-D).

256

## 257 **Architecture of metronidazole treated and untreated *Gardnerella* biofilms**

258 Next, we investigated if the structure of biofilm formed by isolate N170 and treated with  
 259 metronidazole differed from untreated biofilm. We chose N170 as a representative isolate  
 260 because it is a good biofilm former. There was no visible difference between treated and  
 261 untreated biofilms (Fig 5). Morphological heterogeneity of *Gardnerella* cells was observed in  
 262 both treated and untreated biofilms. Extracellular polymeric substances were observed in both  
 263 control and treatment; however, tightly packed cells were more common than extracellular



264 polymeric matrix in both biofilms (Fig 5). Dividing cells were observed in both treated and  
265 untreated biofilms (Fig 5E-H).

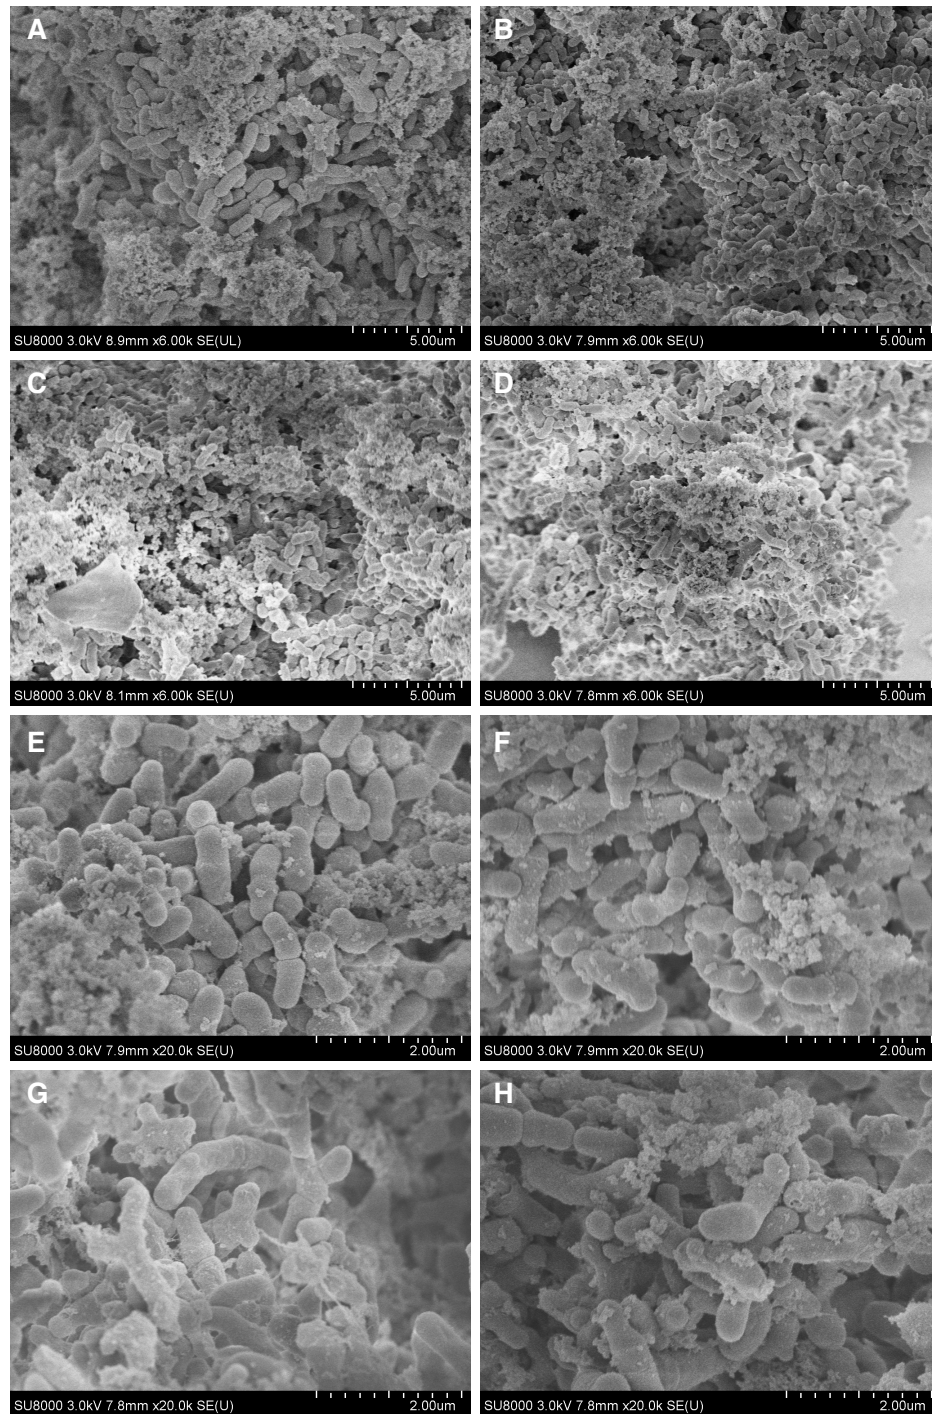

**Fig 5:** *Gardnerella* N170 biofilms. Established biofilms of isolate N170 were treated with 128 g/ml of metronidazole for 24 h. Un-treated controls were maintained. SEM reveals no architectural or morphological differences between treated (A, C, E, G) and control (B, D, F, H) biofilms. Panels A-D are representative images captured at 6,000x and E-H are images at 20,000x.

266

267

268 **Effect of co-culture on survival of *Gardnerella* treated with metronidazole**

269 Since stressful conditions can lead to cooperation between bacterial species, we tested if the  
 270 susceptibility of *Gardnerella* isolates grown in co-culture was different than when grown alone.  
 271 We also investigated if biofilm formation is enhanced when *Gardnerella* isolates are co-cultured  
 272 in the presence of metronidazole. No co-culture had a higher MIC than the highest MIC value of  
 273 either of the two co-cultured isolates (Table 2), and no co-culture produced more biofilm than  
 274 any of the individual isolates included in the co-culture (data not shown).

275 **Table 2.** MIC of co-cultures of *Gardnerella* isolates in BHI+ 0.25% (w/v) maltose with or without 10% (v/v)  
 276 heat inactivated horse serum.

| Isolate 1 (Subgroup) | Isolate 2 (Subgroup) | MIC ( $\mu\text{g/ml}$ ) |           |           |            |           |           |
|----------------------|----------------------|--------------------------|-----------|-----------|------------|-----------|-----------|
|                      |                      | + serum                  |           |           | no serum   |           |           |
|                      |                      | co-culture               | Isolate 1 | Isolate 2 | co-culture | Isolate 1 | Isolate 2 |
| VN003 (A)            | N170 (B)             | 64                       | 32        | 64        | 32         | 32        | 64        |
| VN003 (A)            | N165 (C)             | 64                       | 32        | 64        | 64         | 32        | 128       |
| VN003 (A)            | NR002 (D)            | 32                       | 64        | 64        | 32         | 64        | 64        |
| N170 (B)             | N165 (C)             | 64                       | 64        | 64        | 64         | 64        | 128       |
| N170 (B)             | NR002 (D)            | 16                       | 64        | 64        | 16         | 64        | 64        |
| N165 (C)             | NR002 (D)            | 64                       | 64        | 64        | 64         | 128       | 64        |

277

278 **Discussion**

279 It is widely reported that biofilm formation by bacteria provides protection against antibiotics  
 280 (16, 18, 31, 32). It has also been suggested that bacterial vaginosis treatment failure and  
 281 recurrence is largely because of the capacity of *Gardnerella* and other vaginal bacteria to form  
 282 biofilm (9, 28), however, this phenomenon has not been demonstrated *in vitro*, and a mechanism  
 283 by which biofilm formation protects *Gardnerella* has not been identified.

284 To facilitate two different modes of growth in our study: biofilm and planktonic, we used media  
285 with or without horse serum. Although the mechanisms are yet to be fully understood, there are  
286 reports that inclusion of serum discourages biofilm formation (33, 34), and that low molecular  
287 weight proteins present in the serum may inhibit the transcription of biofilm genes (33). Also, it  
288 has been proposed that for motile species, serum may promote twitching motility, which may  
289 encourage planktonic growth (34). In our study, planktonic growth was dominant in the presence  
290 of serum while biofilm growth was dominant in media without serum (Fig. 1). Despite this  
291 dramatic difference in growth habit, MIC values in the two conditions were highly correlated and  
292 identical MIC values were observed for most isolates regardless of growth medium (Table 1).  
293 The MIC of the majority isolates (54.2%) in both media was 64 µg/ml, which is in agreement  
294 with a previous study which also reported that the MIC of 50% of tested *Gardnerella* isolates  
295 was 64 µg/ml (29). The lack of difference in MIC between biofilm and planktonic cultures  
296 suggests that resistance to metronidazole and differences in MIC among isolates are the result of  
297 properties of the individual isolates and not solely a function of growth mode (planktonic or  
298 biofilm).

299 Although it has been widely accepted that biofilm formation is a stress response that protects  
300 bacteria from insults, including antibacterial compounds, it has also been suggested that biofilm  
301 may simply be a default mode of growth for many bacterial species in particular environments  
302 (12). Based on observations of clinical specimens, this certainly seems to be the case for  
303 *Gardnerella* in the vaginal microbiome (4, 5, 35, 36). While the broth microdilution assay and  
304 MIC determination provides some information about susceptibility of isolates to metronidazole,  
305 it does not simulate the situation *in vivo* where BV associated biofilm is well established prior to  
306 treatment. Biofilm formation can protect bacterial cells by the production of extracellular

307 polymeric substances, by release of antibiotic modifying enzymes and extracellular DNA, and  
308 reduction of metabolic activity and growth rate (17, 37). Since metronidazole, an antibiotic  
309 bactericidal to a broad range of anaerobes, is a common choice of treatment for BV, we  
310 investigated if established *Gardnerella* biofilm can protect its inhabitants from being killed by  
311 metronidazole.

312 To understand how and to what extent biofilm can protect *Gardnerella* cells from metronidazole,  
313 48 h old *Gardnerella* biofilms were exposed to 128 µg/ml metronidazole for 24 h, a  
314 concentration higher than the maximum recorded MIC values of isolates we tested. We measured  
315 viability and metabolic activity by total viable count and resazurin assay. The resazurin assay is a  
316 high-throughput assay to assess metabolic activity (38, 39) and has been used to assess metabolic  
317 activity of bacteria residing in biofilms (40, 41). Our results reveal that metabolic activity is  
318 reduced in most of the tested isolates after exposure to metronidazole for 24 h (Fig 3), however,  
319 in most cases we tested viable *Gardnerella* cells can be recovered from treated biofilms (Fig 2).  
320 Our findings suggest that biofilms can protect cells from the killing effect of metronidazole at the  
321 cost of reduced metabolic activity. Metronidazole enters bacteria by passive diffusion as a  
322 prodrug and has limited activity until it is reduced, which occurs within bacterial cells (42, 43),  
323 and thus, metabolic activity is necessary for the bactericidal effects of the drug to occur.  
324 Exposure to antibiotics can also cause the emergence of persister cells in a biofilm, which can  
325 survive antibiotic treatment by reducing metabolic activity (13).

326 Reduction of metabolic activity at antibiotic concentrations exceeding the MIC has also been  
327 demonstrated in *E. coli* and *S. aureus*; however, in this study metabolic activity was also  
328 increased at sub-MIC concentrations (44). Subinhibitory concentrations of antibiotics can  
329 increase the production of extracellular matrix, enhancing biofilm biomass, slowing the diffusion

330 of antibiotics, and reducing exposure of the bacteria within the biofilm (17, 18). We did not  
331 observe any enhancement of biofilm formation in the vast majority of the tested *Gardnerella*  
332 isolates at sub-MIC concentrations of metronidazole (Fig 4). Enhancement of biofilm formation  
333 by sub-inhibitory concentrations of antibiotics likely depends on the mechanisms of actions of  
334 antibiotics. Yu et al. demonstrated enhancement of biofilm formation in *Enterococcus faecalis* (a  
335 host associated Gram-positive cocci often associated with nosocomial infection) in response to  
336 cell wall synthesis inhibitors such as ampicillin, oxacillin, and Fosfomycin, but not in response to  
337 protein synthesis, DNA synthesis, and RNA synthesis inhibitors, such as erythromycin,  
338 ciprofloxacin, and rifampicin (22). It has been suggested that antimicrobial compounds, such as  
339 pyocins, which kill bacteria by damaging the cell wall, can enhance cellular attachment at sub-  
340 lethal concentrations leading to increased biofilm formation (45). Metronidazole, however, kills  
341 primarily anaerobic and facultative anaerobic bacteria by formation of reactive oxygen species  
342 (ROS), which damages bacterial DNA (23). Therefore, it is conceivable that due to its mode of  
343 action, metronidazole would not be expected to stimulate biofilm formation.

344 Since metabolic activity was reduced in biofilms treated with metronidazole and no enhancement  
345 of biofilm formation was observed at sub-MIC levels, we sought to determine if metronidazole  
346 treatment affects the structure of *Gardnerella* biofilm. We performed an SEM to visualize any  
347 morphological or structural differences between biofilms treated with metronidazole and  
348 untreated control biofilms. Although no differences were observed between treated and untreated  
349 biofilms formed by isolate N170, we observed that the biofilm was largely composed of bacterial  
350 cells in compact masses, and extracellular polymeric substance was not a major component of  
351 the structure. Although SEM alone cannot determine if any other changes were happening in the  
352 biofilms treated with metronidazole (sensors, florescence microscopy, and nanoparticles can

353 provide a better understanding of what changes may occur in a biofilm treated with antibiotics),  
354 the fact that biofilm formation was not enhanced by sub-inhibitory concentrations of  
355 metronidazole and extracellular polymeric substance was not abundant in *Gardnerella* biofilm  
356 suggest that extracellular polymeric substance does not play a major role in providing protection  
357 against metronidazole (46, 47).

358 When exposed to antimicrobials, otherwise competing bacteria may cooperate for a greater  
359 purpose: to survive environmental stress (48, 49). Targeting cooperative behaviours can be an  
360 effective method to treat biofilm infection (50). The results of our co-culture experiments  
361 showed no evidence of synergy between *Gardnerella* spp. when exposed to antibiotics. This  
362 finding is contrary to some other observations of either environmental (48) or well-characterized  
363 Gram-negative bacterial isolates (50) but the overall dearth of information available regarding  
364 cooperation between isolates when exposed to antibiotics makes it impossible to know if these  
365 cases are the exception or the rule. We nevertheless, reported previously that coculturing  
366 *Gardnerella* isolates does not have any synergistic effects (8, 51).

## 367 **Conclusions**

368 Overall, we have observed that established *Gardnerella* biofilm can survive metronidazole  
369 treatment at levels above the MIC and this survival is associated with a reduction in metabolic  
370 activity during antibiotic exposure. Metronidazole does not affect the architecture of *Gardnerella*  
371 biofilm *in vitro* as observed by SEM. By reducing metabolic activity in response to exposure to  
372 metronidazole, *Gardnerella* growing in established biofilms in the vaginal microbiome may  
373 avoid the bactericidal effects of the drug and resume growth once treatment ends. From a clinical  
374 perspective, management of recurrent vaginosis may be improved by methods to mitigate the

375 ecological processes that lead to expansion of *Gardnerella* populations and establishment of  
376 biofilm.

377

### 378 **Acknowledgements**

379 This research was supported by a Natural Sciences and Engineering Research Council of Canada  
380 Discovery Grant to JEH. The authors are grateful to Eiko Kawamura, WCVI Imaging Centre,  
381 for assistance with SEM, and to Champika Fernando for excellent technical support. Thanks to  
382 Dr. Joe Rubin, and to the entire Hill Lab for helpful discussions and feedback. No thanks to  
383 COVID-19.

384

### 385 **References**

386

- 387 1. Ahmed A, Earl J, Retchless A, Hillier SL, Rabe LK, Cherpes TL, Powell E, Janto B, Eutsey  
388 R, Hiller NL, Boissy R, Dahlgren ME, Hall BG, Costerton JW, Post JC, Hu FZ, Ehrlich  
389 GD. 2012. Comparative genomic analyses of 17 clinical isolates of *Gardnerella vaginalis*  
390 provide evidence of multiple genetically isolated clades consistent with subspeciation into  
391 genovars. *J Bacteriol* 194:3922–37.
- 392 2. Paramel Jayaprakash T, Schellenberg JJ, Hill JE. 2012. Resolution and characterization of  
393 distinct cpn60-based subgroups of *Gardnerella vaginalis* in the vaginal microbiota. *PLoS*  
394 *ONE* 7:e43009.
- 395 3. Vaneechoutte M, Guschin A, Van Simaey L, Gansemans Y, Van Nieuwerburgh F, Cools P.  
396 2019. Emended description of *Gardnerella vaginalis* and description of *Gardnerella*  
397 *leopoldii* sp. nov., *Gardnerella piotii* sp. nov. and *Gardnerella swidsinskii* sp. nov., with  
398 delineation of 13 genomic species within the genus *Gardnerella*. *International Journal of*  
399 *Systematic and Evolutionary Microbiology* 69:679–687.
- 400 4. Swidsinski A, Mendling W, Loening-Baucke V, Ladhoff A, Swidsinski S, Hale LP, Lochs  
401 H. 2005. Adherent biofilms in bacterial vaginosis. *Obstet Gynecol* 106:1013–1023.
- 402 5. Swidsinski A, Verstraelen H, Loening-Baucke V, Swidsinski S, Mendling W, Halwani Z.  
403 2013. Presence of a polymicrobial endometrial biofilm in patients with bacterial vaginosis.  
404 *PLoS One* 8:e53997.
- 405 6. Hardy L, Cerca N, Jaspers V, Vaneechoutte M, Crucitti T. 2017. Bacterial biofilms in the  
406 vagina. *Research in Microbiology* 168:865–874.



- 407 7. Harwich MD, Alves JM, Buck GA, Strauss JF, Patterson JL, Oki AT, Girerd PH, Jefferson  
408 KK. 2010. Drawing the line between commensal and pathogenic *Gardnerella vaginalis*  
409 through genome analysis and virulence studies. BMC Genomics 11:375.
- 410 8. Khan S, Voordouw MJ, Hill JE. 2019. Competition among *Gardnerella* subgroups from the  
411 human vaginal microbiome. Front Cell Infect Microbiol 9:374.
- 412 9. Machado D, Castro J, Palmeira-de-Oliveira A, Martinez-de-Oliveira J, Cerca N. 2015.  
413 Bacterial vaginosis biofilms: Challenges to current therapies and emerging solutions.  
414 Frontiers in Microbiology 6:1528.
- 415 10. Patterson JL, Stull-Lane A, Girerd PH, Jefferson KK. 2010. Analysis of adherence, biofilm  
416 formation and cytotoxicity suggests a greater virulence potential of *Gardnerella vaginalis*  
417 relative to other bacterial-vaginosis-associated anaerobes. Microbiology 156:392–9.
- 418 11. Donlan RM, Costerton JW. 2002. Biofilms: survival mechanisms of clinically relevant  
419 microorganisms. Clin Microbiol Rev 15:167–193.
- 420 12. Jefferson KK. 2004. What drives bacteria to produce a biofilm? FEMS Microbiology  
421 Letters 236:163–173.
- 422 13. Lewis K. 2008. Multidrug Tolerance of Biofilms and Persister Cells, p. 107–131. In  
423 Romeo, T (ed.), Bacterial Biofilms. Springer, Berlin, Heidelberg.
- 424 14. Raghupathi PK, Liu W, Sabbe K, Houf K, Burmølle M, Sørensen SJ. 2018. Synergistic  
425 Interactions within a Multispecies Biofilm Enhance Individual Species Protection against  
426 Grazing by a Pelagic Protozoan. Frontiers in Microbiology 8:2649.
- 427 15. Vidakovic L, Singh PK, Hartmann R, Nadell CD, Drescher K. 2018. Dynamic biofilm  
428 architecture confers individual and collective mechanisms of viral protection. Nat  
429 Microbiol 3:26–31.
- 430 16. Lebeaux D, Ghigo J-M, Beloin C. 2014. Biofilm-related infections: bridging the gap  
431 between clinical management and fundamental aspects of recalcitrance toward antibiotics.  
432 Microbiol Mol Biol Rev 78:510–543.
- 433 17. Mah T-FC, O’Toole GA. 2001. Mechanisms of biofilm resistance to antimicrobial agents.  
434 Trends in Microbiology 9:34–39.
- 435 18. Mah T-FC. 2012. Biofilm-specific antibiotic resistance. Future Microbiology 7:1061–1072.
- 436 19. Andersson DI, Hughes D. 2014. Microbiological effects of sublethal levels of antibiotics.  
437 Nat Rev Microbiol 12:465–478.
- 438 20. Hoffman LR, D’Argenio DA, MacCoss MJ, Zhang Z, Jones RA, Miller SI. 2005.  
439 Aminoglycoside antibiotics induce bacterial biofilm formation. Nature 436:1171–1175.

- 440 21. Oliveira NM, Martinez-Garcia E, Xavier J, Durham WM, Kolter R, Kim W, Foster KR.  
441 2015. Biofilm formation as a response to ecological competition. PLoS Biology  
442 13:e1002191.
- 443 22. Yu W, Hallinen KM, Wood KB. 2018. Interplay between Antibiotic Efficacy and Drug-  
444 Induced Lysis Underlies Enhanced Biofilm Formation at Subinhibitory Drug  
445 Concentrations. Antimicrobial Agents and Chemotherapy 62:e01603-17.
- 446 23. Sigeti JS, Guiney DG Jr, Davis CE. 1983. Mechanism of action of metronidazole on  
447 *Bacteroides fragilis*. The Journal of Infectious Diseases 148:1083–1089.
- 448 24. Swidsinski A, Mendling W, Loening-Baucke V, Swidsinski S, Dorffel Y, Scholze J, Lochs  
449 H, Verstraelen H. 2008. An adherent *Gardnerella vaginalis* biofilm persists on the vaginal  
450 epithelium after standard therapy with oral metronidazole. American Journal of Obstetrics  
451 and Gynecology 198:97 e1–6.
- 452 25. Verwijs MC, Agaba SK, Darby AC, Wiggert JHHM van de. 2020. Impact of oral  
453 metronidazole treatment on the vaginal microbiota and correlates of treatment failure.  
454 American Journal of Obstetrics & Gynecology 222:157.e1-157.e13.
- 455 26. Alauzet C, Lozniewski A, Marchandin H. 2019. Metronidazole resistance and nim genes in  
456 anaerobes: A review. Anaerobe 55:40–53.
- 457 27. Smith A. 2018. Metronidazole resistance: a hidden epidemic? Br Dent J 224:403–404.
- 458 28. Muzny CA, Schwebke JR. 2015. Biofilms: An Underappreciated Mechanism of Treatment  
459 Failure and Recurrence in Vaginal Infections. Clinical Infectious Diseases 61:601–606.
- 460 29. Petrina MAB, Cosentino LA, Rabe LK, Hillier SL. 2017. Susceptibility of bacterial  
461 vaginosis (BV)-associated bacteria to secnidazole compared to metronidazole, tinidazole  
462 and clindamycin. Anaerobe 47:115–119.
- 463 30. Wiegand I, Hilpert K, Hancock REW. 2008. Agar and broth dilution methods to determine  
464 the minimal inhibitory concentration (MIC) of antimicrobial substances. Nat Protoc 3:163–  
465 175.
- 466 31. Bowler P, Murphy C, Wolcott R. 2020. Biofilm exacerbates antibiotic resistance: Is this a  
467 current oversight in antimicrobial stewardship? Antimicrobial Resistance & Infection  
468 Control 9:162.
- 469 32. Costerton JW. 1999. Bacterial Biofilms: A Common Cause of Persistent Infections. Science  
470 284:1318–1322.
- 471 33. Abraham NM, Jefferson KK. 2010. A low molecular weight component of serum inhibits  
472 biofilm formation in *Staphylococcus aureus*. Microbial Pathogenesis 49:388–391.

- 473 34. Hammond A, Dertien J, Colmer-Hamood JA, Griswold JA, Hamood AN. 2010. Serum  
474 Inhibits *P. aeruginosa* Biofilm Formation on Plastic Surfaces and Intravenous Catheters.  
475 Journal of Surgical Research 159:735–746.
- 476 35. Hardy L, Jespers V, Dahchour N, Mwambarangwe L, Musengamana V, Vaneechoutte M,  
477 Crucitti T. 2015. Unravelling the bacterial vaginosis-associated biofilm: A multiplex  
478 *Gardnerella vaginalis* and *Atopobium vaginae* fluorescence in situ hybridization assay  
479 using peptide nucleic acid probes. PLoS One 10:e0136658.
- 480 36. Hardy L, Jespers V, Abdellati S, De Baetselier I, Mwambarangwe L, Musengamana V, van  
481 de Wijgert J, Vaneechoutte M, Crucitti T. 2016. A fruitful alliance: the synergy between  
482 *Atopobium vaginae* and *Gardnerella vaginalis* in bacterial vaginosis-associated biofilm.  
483 Sexually Transmitted Infections 92:487–491.
- 484 37. Hall CW, Mah T-F. 2017. Molecular mechanisms of biofilm-based antibiotic resistance and  
485 tolerance in pathogenic bacteria. FEMS Microbiology Reviews 41:276–301.
- 486 38. Costa P, Gomes ATPC, Braz M, Pereira C, Almeida A. 2021. Application of the Resazurin  
487 Cell Viability Assay to Monitor *Escherichia coli* and *Salmonella* Typhimurium Inactivation  
488 Mediated by Phages. 8. Antibiotics 10:974.
- 489 39. Osaka I, Hefty PS. 2013. Simple Resazurin-Based Microplate Assay for Measuring  
490 *Chlamydia* Infections. Antimicrobial Agents and Chemotherapy 57:2838–2840.
- 491 40. Dalecki AG, Crawford CL, Wolschendorf F. 2016. Targeting Biofilm Associated  
492 *Staphylococcus aureus* Using Resazurin Based Drug-susceptibility Assay. JoVE (Journal of  
493 Visualized Experiments) e53925.
- 494 41. Mariscal A, Lopez-Gigosos RM, Carnero-Varo M, Fernandez-Crehuet J. 2009. Fluorescent  
495 assay based on resazurin for detection of activity of disinfectants against bacterial biofilm.  
496 Appl Microbiol Biotechnol 82:773–783.
- 497 42. Freeman CD, Klutman NE, Lamp KC. 1997. Metronidazole. Drugs 54:679–708.
- 498 43. Samuelson J. 1999. Why Metronidazole Is Active against both Bacteria and Parasites.  
499 Antimicrobial Agents and Chemotherapy 43:1533–1541.
- 500 44. Lobritz MA, Belenky P, Porter CBM, Gutierrez A, Yang JH, Schwarz EG, Dwyer DJ,  
501 Khalil AS, Collins JJ. 2015. Antibiotic efficacy is linked to bacterial cellular respiration.  
502 PNAS 112:8173–8180.
- 503 45. Oliveira NM, Martinez-Garcia E, Xavier J, Durham WM, Kolter R, Kim W, Foster KR.  
504 2015. Biofilm Formation As a Response to Ecological Competition. PLOS Biology  
505 13:e1002191.
- 506 46. Cronenberg T, Hennes M, Wielert I, Maier B. 2021. Antibiotics modulate attractive  
507 interactions in bacterial colonies affecting survivability under combined treatment. PLOS  
508 Pathogens 17:e1009251.

- 509 47. Powell LC, Abdulkarim M, Stokniene J, Yang QE, Walsh TR, Hill KE, Gumbleton M,  
510 Thomas DW. 2021. Quantifying the effects of antibiotic treatment on the extracellular  
511 polymer network of antimicrobial resistant and sensitive biofilms using multiple particle  
512 tracking. *npj Biofilms Microbiomes* 7:1–11.
- 513 48. Burmølle M, Webb JS, Rao D, Hansen LH, Sørensen SJ, Kjelleberg S. 2006. Enhanced  
514 Biofilm Formation and Increased Resistance to Antimicrobial Agents and Bacterial  
515 Invasion Are Caused by Synergistic Interactions in Multispecies Biofilms. *Applied and  
516 Environmental Microbiology* 72:3916–3923.
- 517 49. Piccardi P, Vessman B, Mitri S. 2019. Toxicity drives facilitation between 4 bacterial  
518 species. *PNAS* 116:15979–15984.
- 519 50. Dieltjens L, Appermans K, Lissens M, Lories B, Kim W, Van der Eycken EV, Foster KR,  
520 Steenackers HP. 2020. Inhibiting bacterial cooperation is an evolutionarily robust anti-  
521 biofilm strategy. *Nat Commun* 11:107.
- 522 51. Khan S, Vancuren SJ, Hill JE. 2020. A generalist lifestyle allows rare *Gardnerella* spp. to  
523 persist at low levels in the vaginal microbiome. *Microb Ecol*  
524 <https://doi.org/10.1007/s00248-020-01643-1>.
- 525
